# Supplementary material for: 4,7-Di-2-thienyl-2,1,3-benzothiadiazole with hexylthiophene side chains and a benzodithiophene based copolymer for efficient organic solar cells
Source: Royal Society of Chemistry journal article supplement (doi:10.1039/c5py00199d), 2015-01-01
Supplement: c5py00199d1.pdf [file c5py00199d1.pdf]

## Supporting information

### 4,7-Di-2-thienyl-2,1,3-benzothiadiazole with hexylthiophene side chains and a benzodithiophene Q2 based copolymer for efficient organic solar cells

Junzhen Ren<sup>a,b,‡</sup>, Xichang Bao<sup>b,‡</sup>, Liangliang Han<sup>b</sup>, Jiuxing Wang<sup>b</sup>, Meng Qiu<sup>b</sup>, Qianqian Zhu<sup>b</sup>,  
Tong Hu<sup>a,b</sup>, Ruiying Sheng<sup>a,b</sup>, Mingliang Sun<sup>a\*</sup>, Renqiang Yang<sup>b\*</sup>.

<sup>a</sup> *Institute of Material Science and Engineering, Ocean University of China, Qingdao 266100, People's Republic of China. Fax: 86-532-66781927; Tel: 86-532-66781690; E-mail: mlsun@ouc.edu.cn*

<sup>b</sup> *CAS Key Laboratory of Bio-based Materials, Qingdao Institute of Bioenergy and Bioprocess Technology, Chinese Academy of Sciences, Qingdao 266101, People's Republic of China. Fax: 86-532-80662778; Tel: 86-532-80662700; E-mail: yangrq@qibebt.ac.cn*

<sup>‡</sup> *J. Ren and X. Bao contributed equally to this work.*

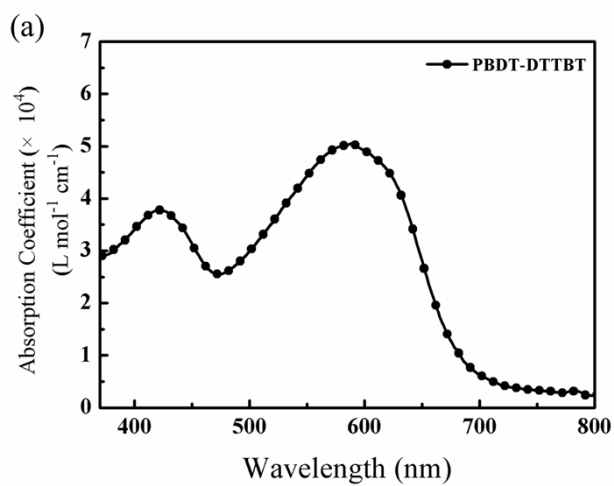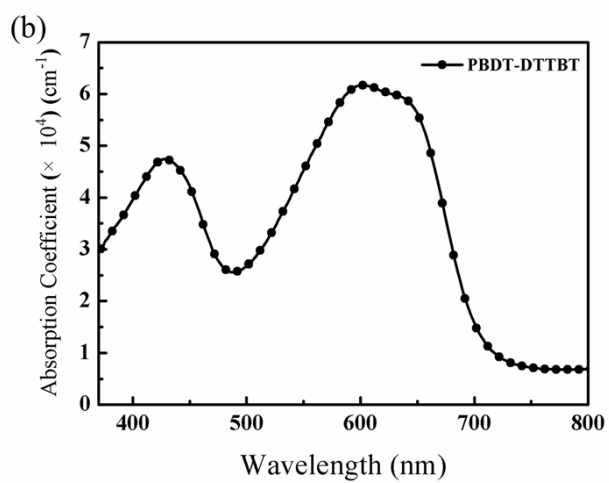

Figure S1. The absorption coefficient of PBDT-DTTBT in the  $\text{CHCl}_3$  solution (a) and thin solid film (b).

**Table S1** Photovoltaic properties of the PSCs based on the blend of PBDT-DTTBT and PC<sub>71</sub>BM

| Ratio<br>(A : D,<br>w/w) | DIO<br>(%) | $V_{oc}$<br>(V) | $J_{sc}$<br>(mA/cm <sup>2</sup> ) | FF<br>(%)  | PCE <sub>max</sub> /PCE <sub>ave</sub> <sup>a</sup> |
|--------------------------|------------|-----------------|-----------------------------------|------------|-----------------------------------------------------|
| 1.5 : 1                  | 2          | 0.81±0.01       | 10.64±0.04                        | 57.53±0.16 | 4.97/ (4.96±0.01)                                   |
| 1 : 1                    | 2          | 0.80±0.01       | 12.56±0.22                        | 60.38±0.70 | 6.19/ (6.05±0.16)                                   |
| 1 : 1.5                  | 2          | 0.80±0.01       | 9.99±0.10                         | 62.82±0.23 | 4.93/ (4.87±0.07)                                   |
| 1 : 2                    | 2          | 0.79±0.01       | 9.68±0.17                         | 62.14±1.04 | 4.91/ (4.78±0.12)                                   |

<sup>a</sup> The average PCE was obtained from five devices.

**Figure S2.**  $J$ - $V$  curves of the PSCs based on PBDT-DTTBT and PC<sub>71</sub>BM with different D/A ratios.

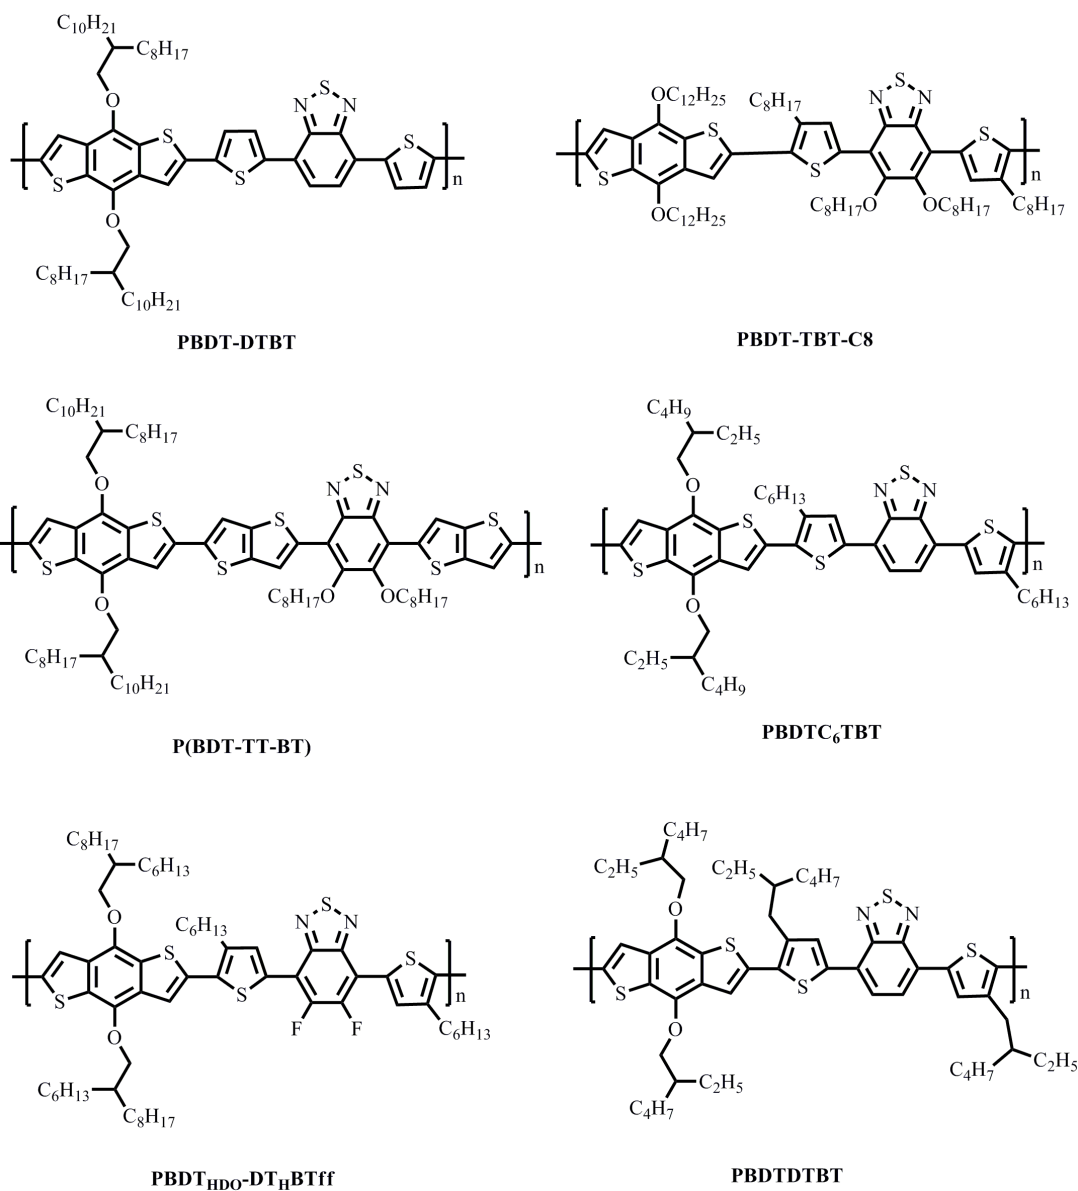

**Figure S3.** The molecular structures of PBDT-DTBT, PBDT-TBT-C8, P(BDT-TT-BT), PBDT<sub>HDO</sub>-DT<sub>H</sub>BTff and PBDTDTBT.

**Figure S4.** XRD pattern of PBDT-DTTBT as film

**Figure S5.**  $^1\text{H}$  NMR spectrum of compound 4.

**Figure S6.**  $^1\text{H}$  NMR spectrum of DTTBT.

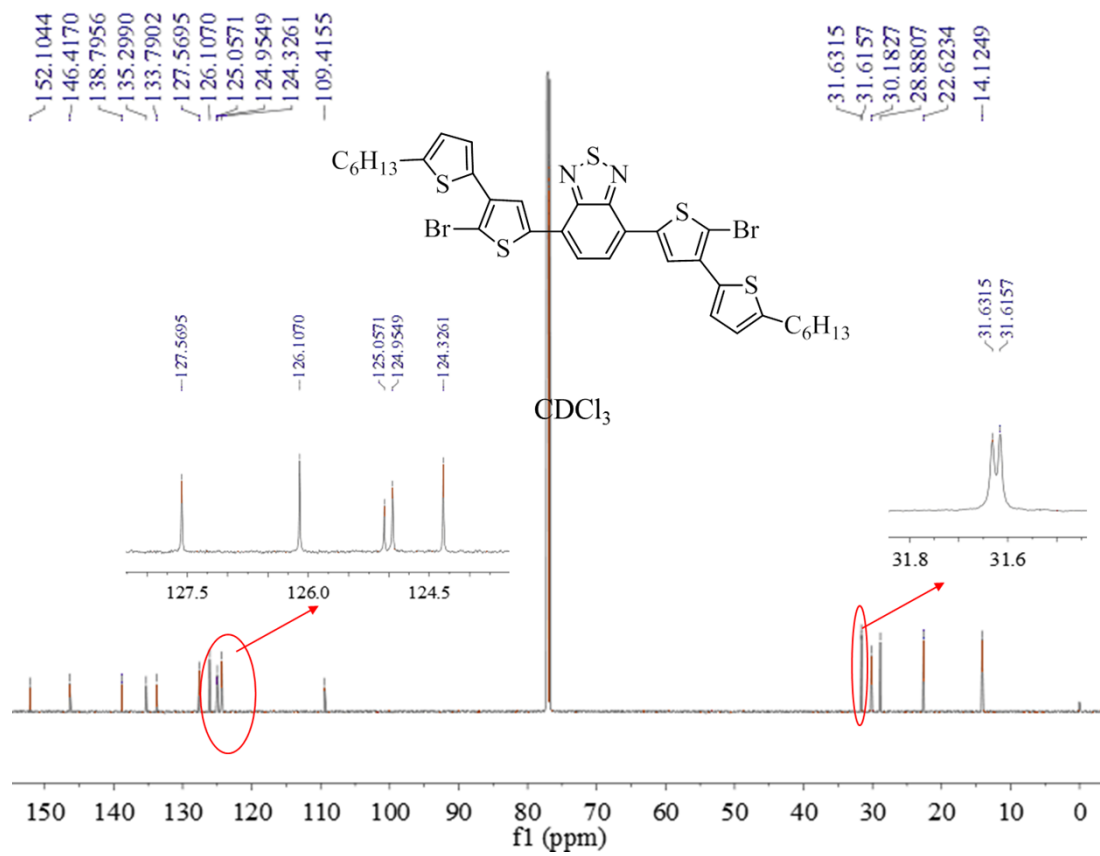

**Figure S7.**  $^{13}\text{C}$  NMR spectrum of DTTBT.



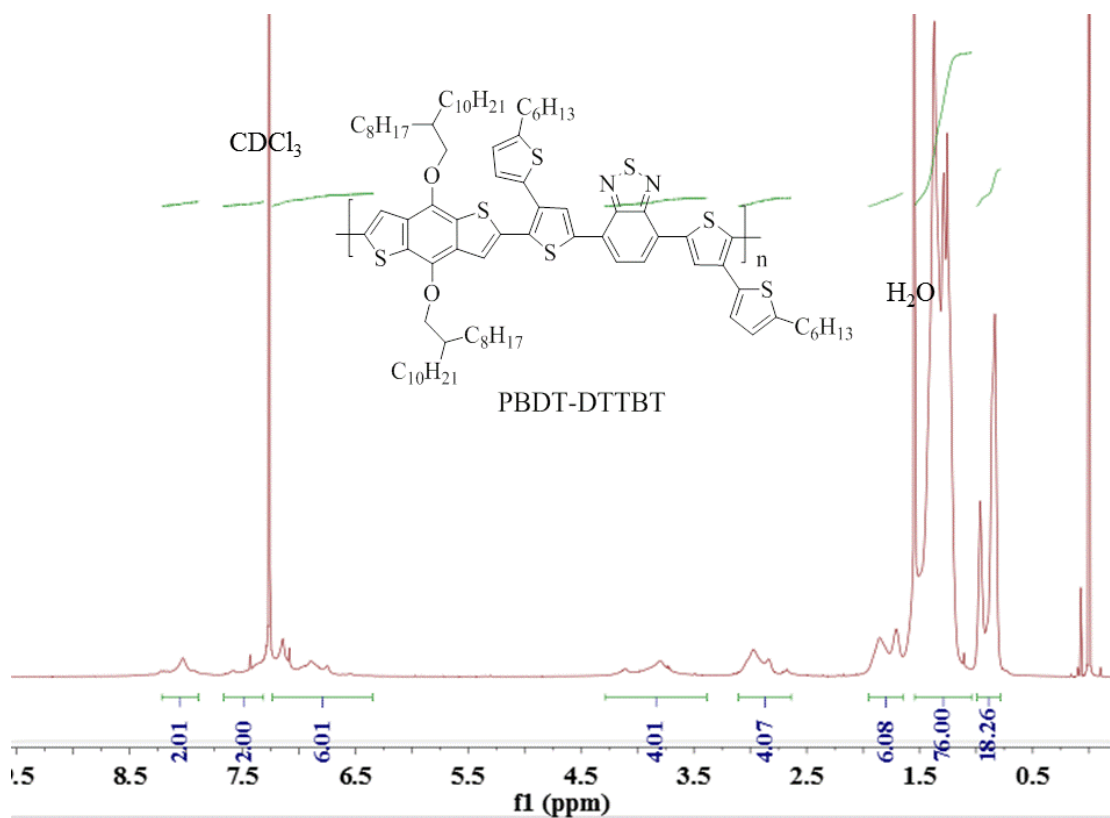

**Figure S8.** <sup>1</sup>H NMR spectrum of PBDT-DTTBT.
